# Supplementary material for: Mitochondrial Proteome Changes in Rett Syndrome
Source: MDPI journal article supplement (doi:10.3390/biology12070956), 2023-07-03

Complete gel, Figure 2A (OXPHOS Complexes, Hippocampus)

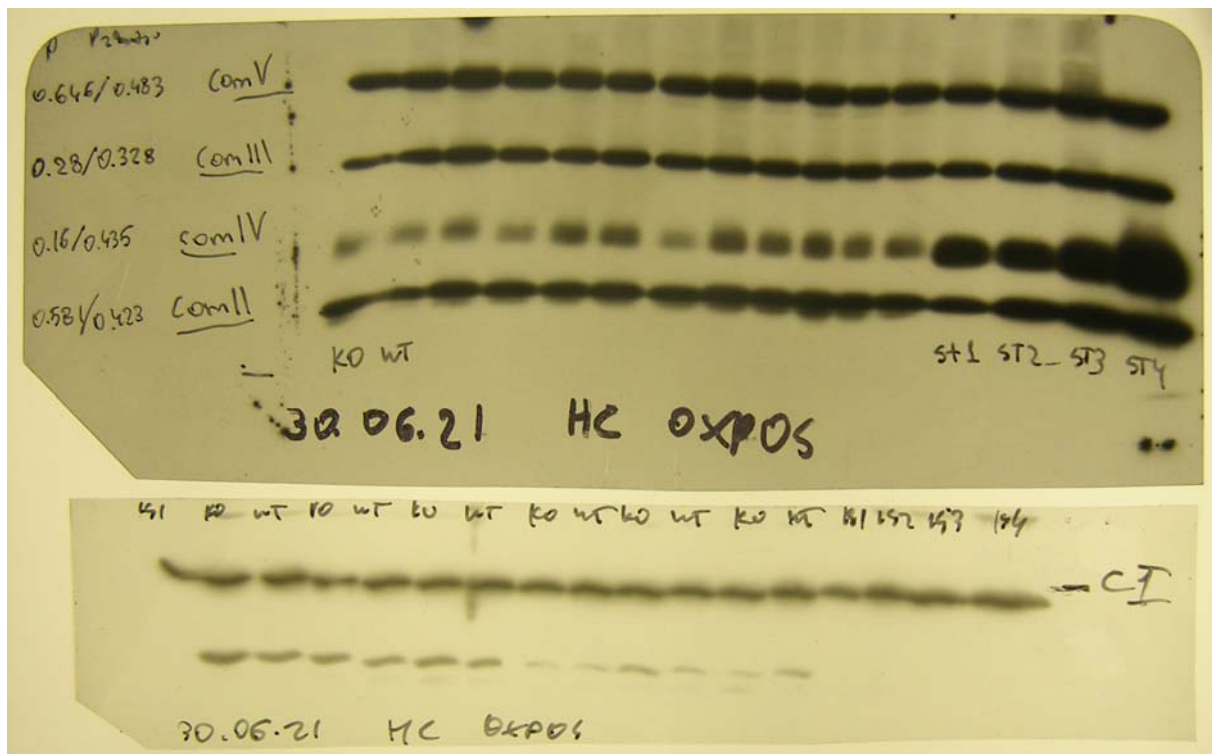

Complete gel, Figure 2B (OXPHOS complexes, Neocortex)

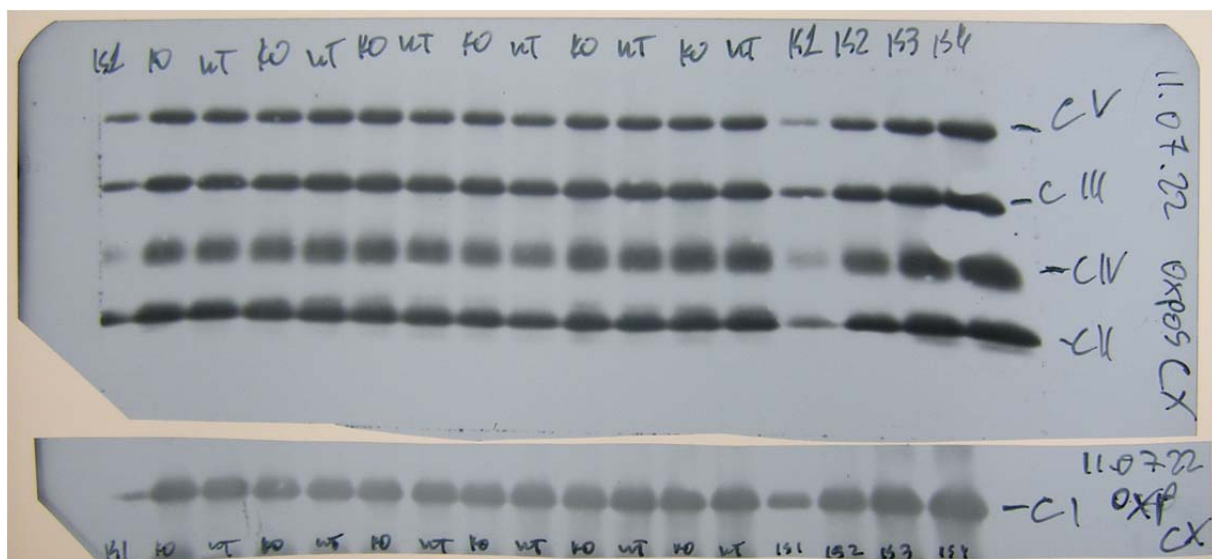

Complete gel, Figure 3A (Mitofusin-1, Neocortex)

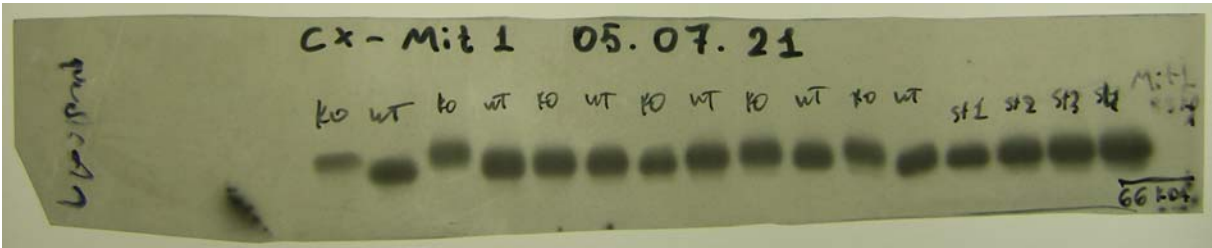

Complete gel, Figure 4A (DRP-1, Hippocampus)

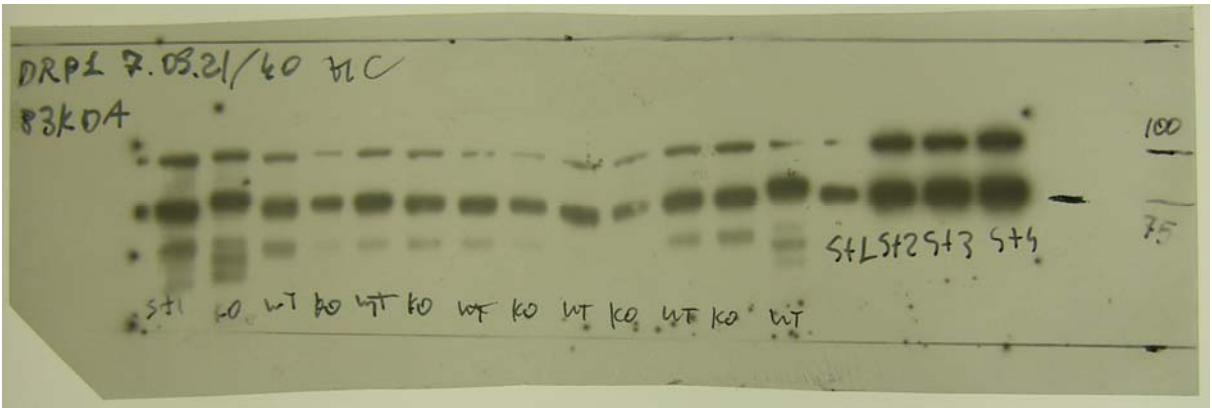

Gels shown in Figure 5A & 5B in the manuscript already do represent the complete gel images.

Complete gel, Figure 6A (Creatine kinase B, Hippocampus)

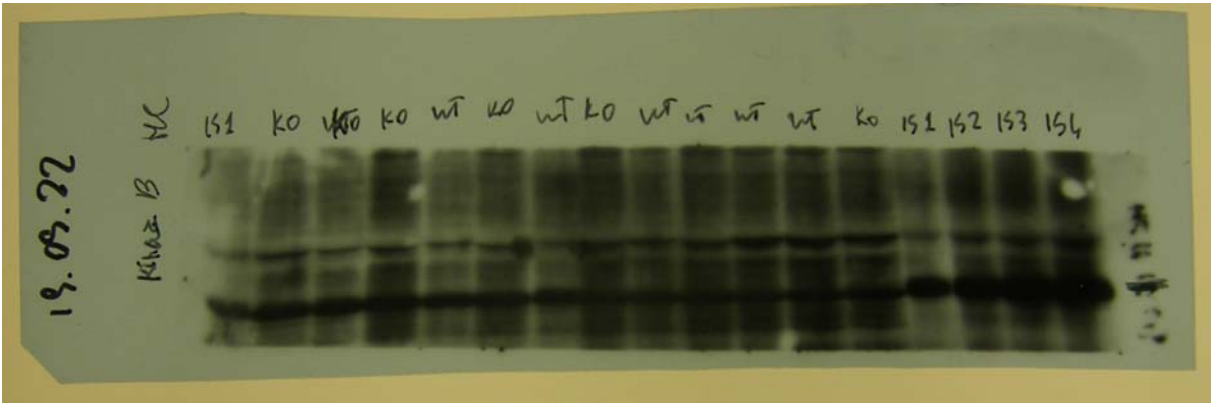

Complete gel, Figure 7A (14-3-3 Protein theta, Neocortex)

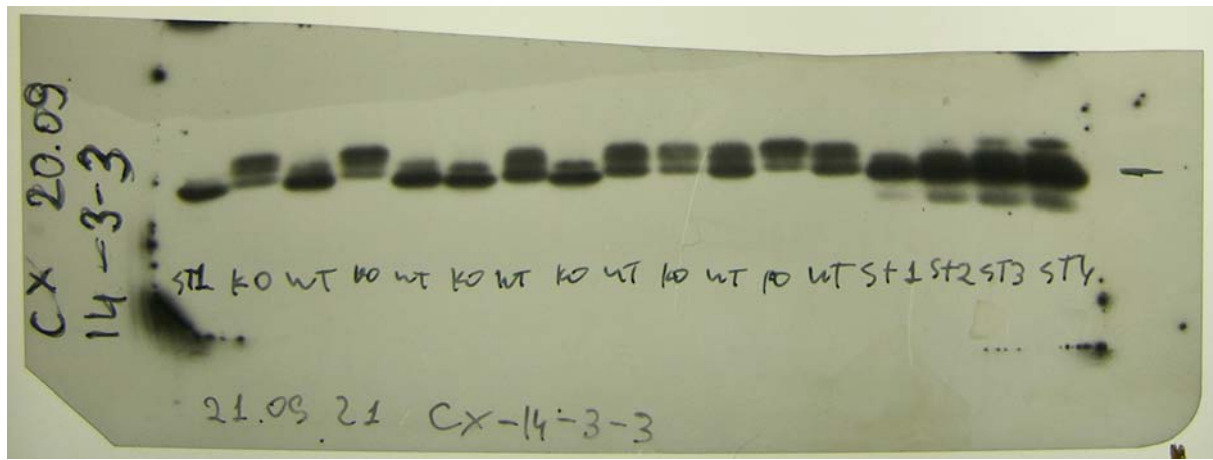

Complete gel, Figure 8A (HSP 60, Neocortex)

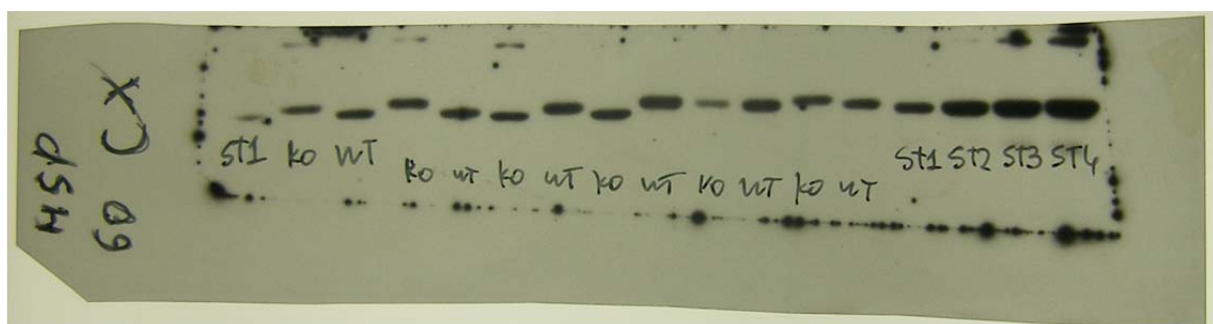

Supplement: s1 [file s1]
