# Supplementary material for: Mitochondrial Proteome Changes in Rett Syndrome
Source: MDPI journal article supplement (doi:10.3390/biology12070956), 2023-07-03
Supplement: s1 [file s1]

## Wildtype hippocampus

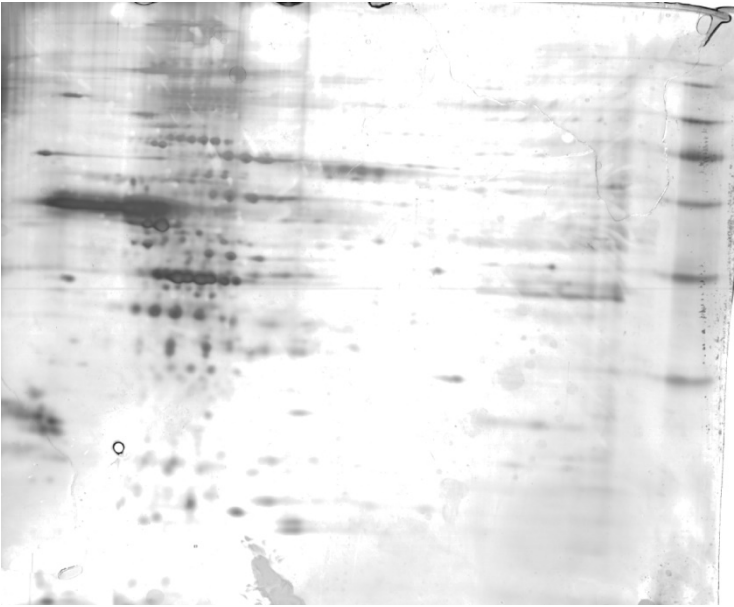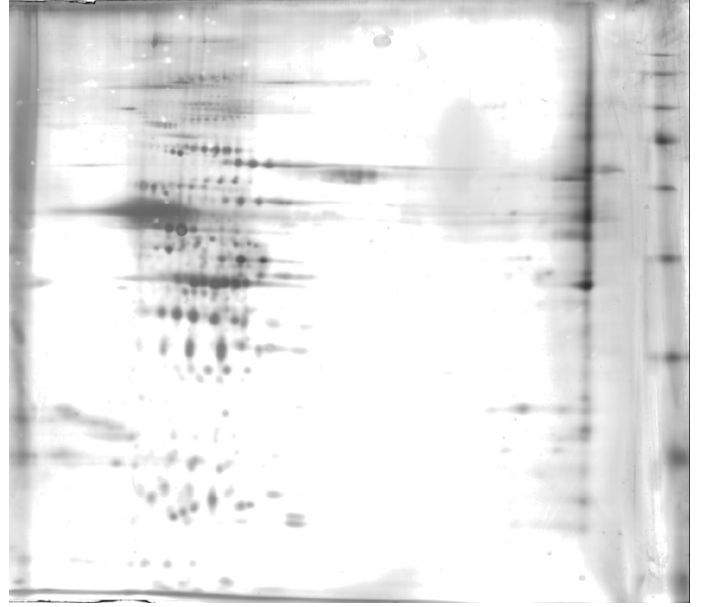

Wildtype hippocampus 1

Wildtype hippocampus 2

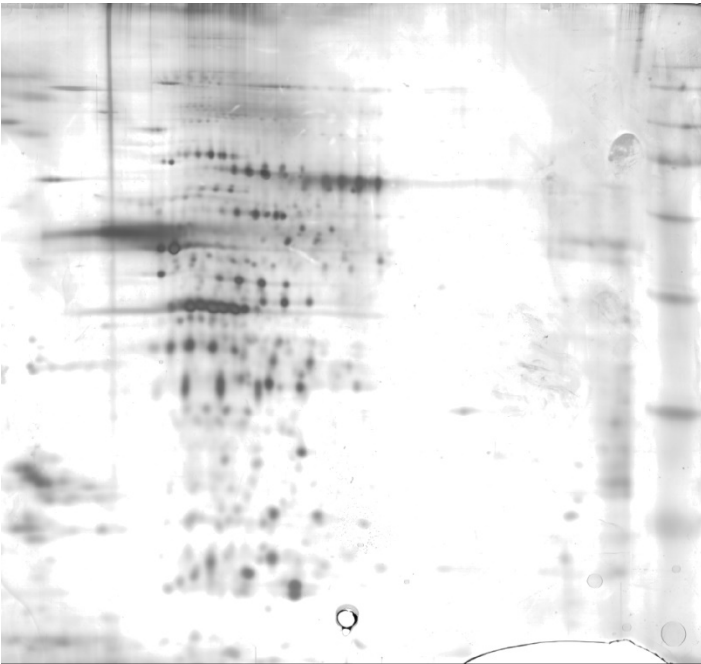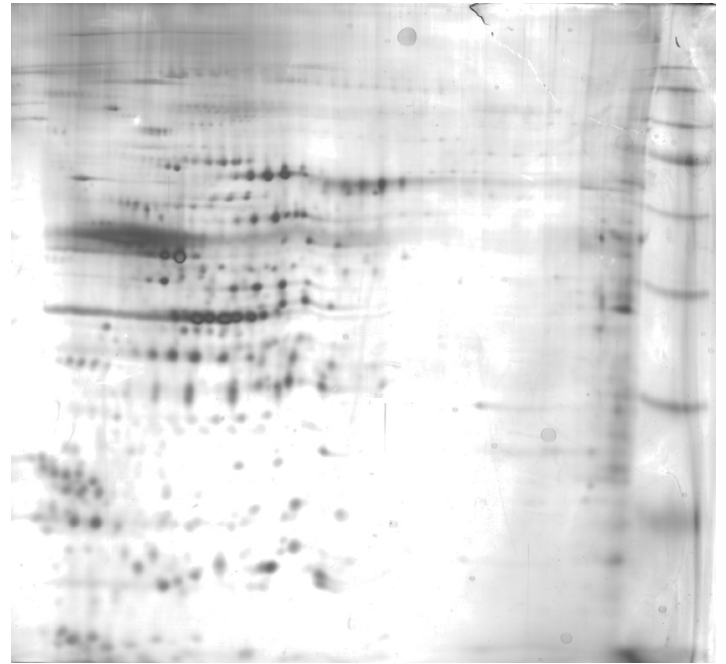

Wildtype hippocampus 3

Wildtype hippocampus 4

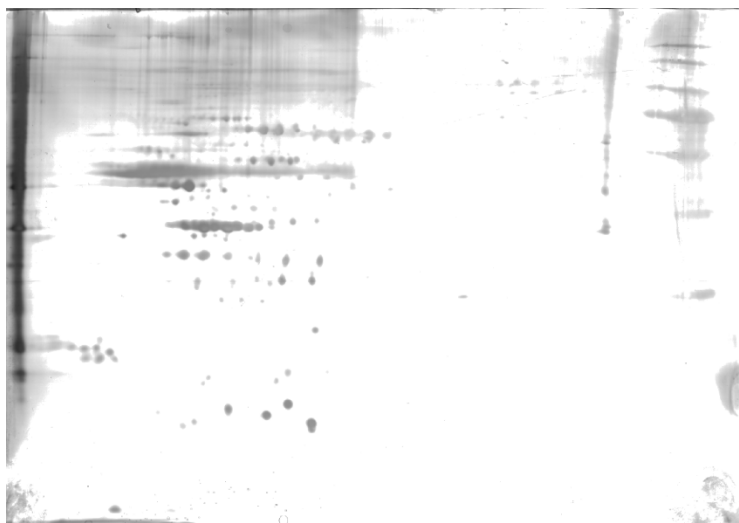

Wildtype hippocampus 5

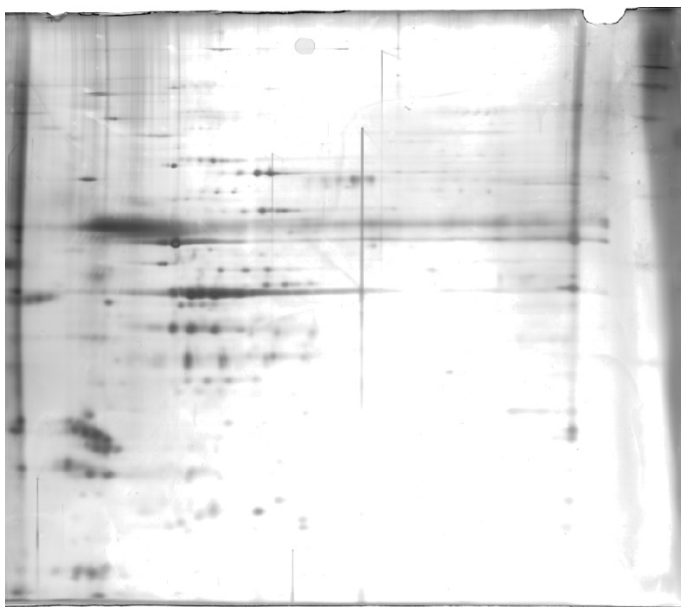

Wildtype hippocampus 6

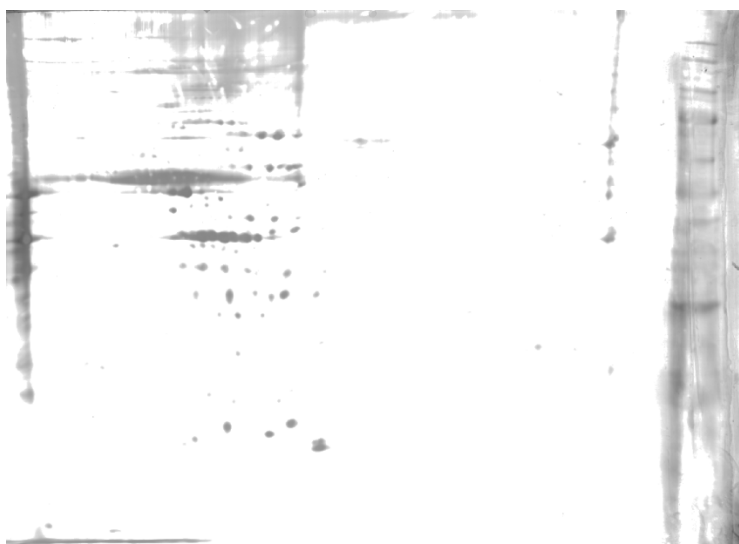

Wildtype hippocampus 7

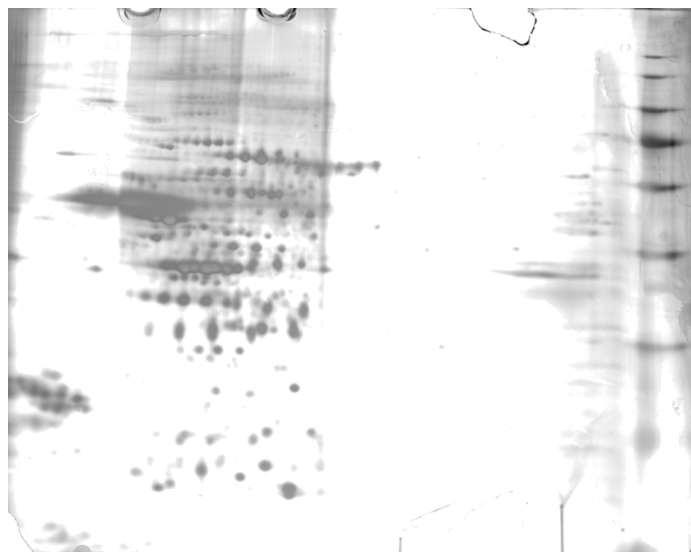

Wildtype hippocampus 8

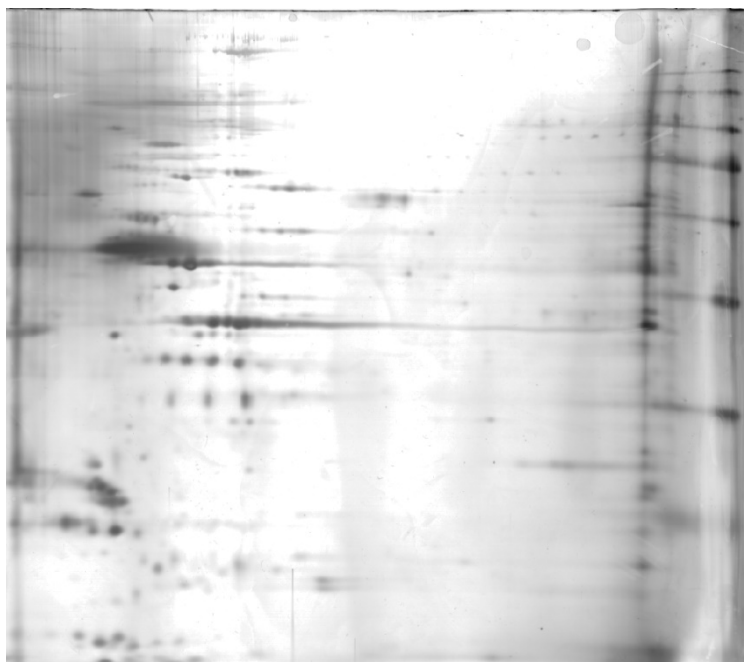

Wildtype hippocampus 9

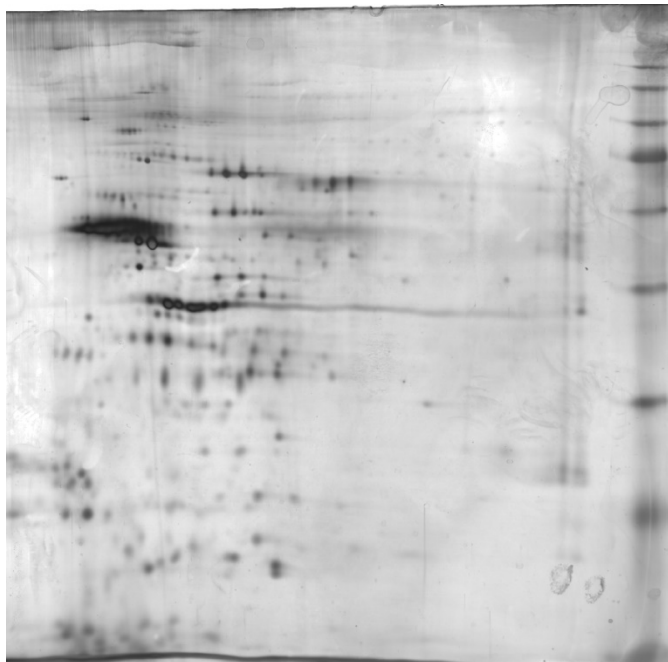

Wildtype hippocampus 10

*Mecp2*<sup>-y</sup> hippocampus

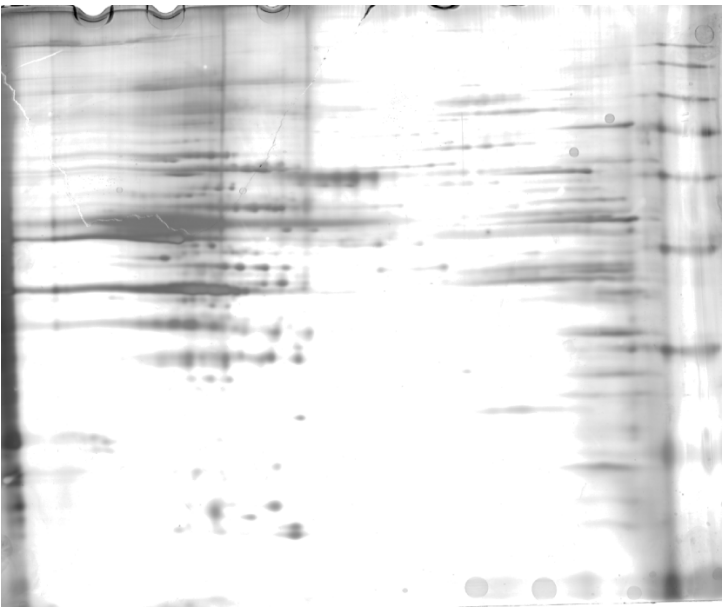

*Mecp2*<sup>-y</sup> hippocampus 1

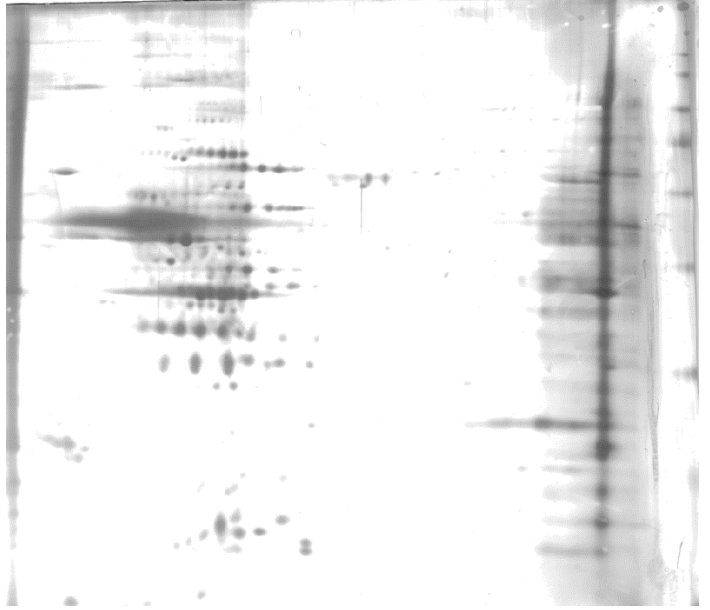

*Mecp2*<sup>-y</sup> hippocampus 2

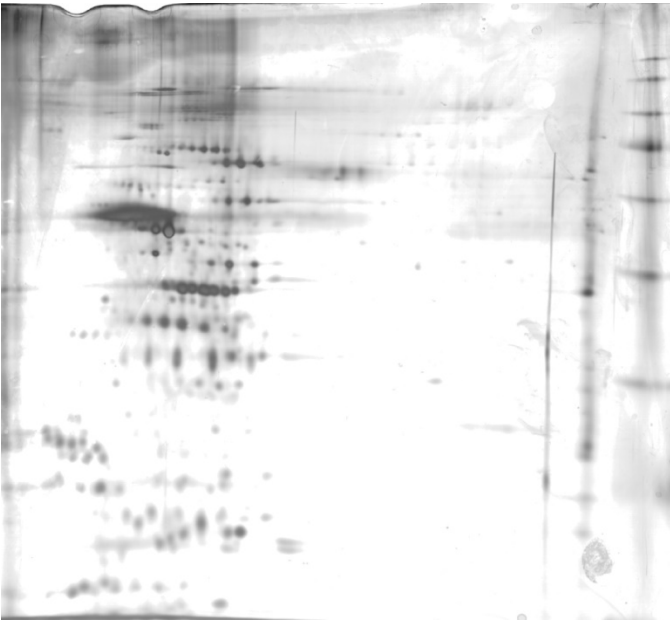

*Mecp2*<sup>-y</sup> hippocampus 3

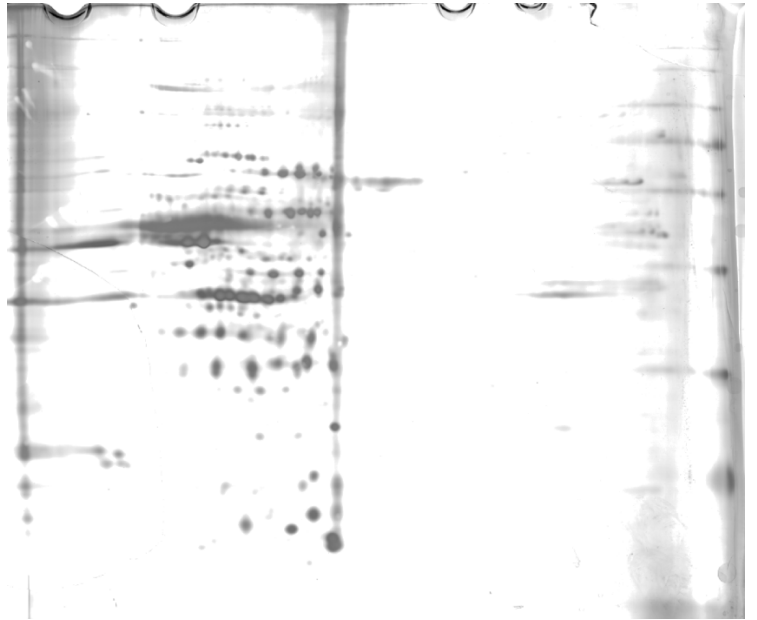

*Mecp2*<sup>-y</sup> hippocampus 4

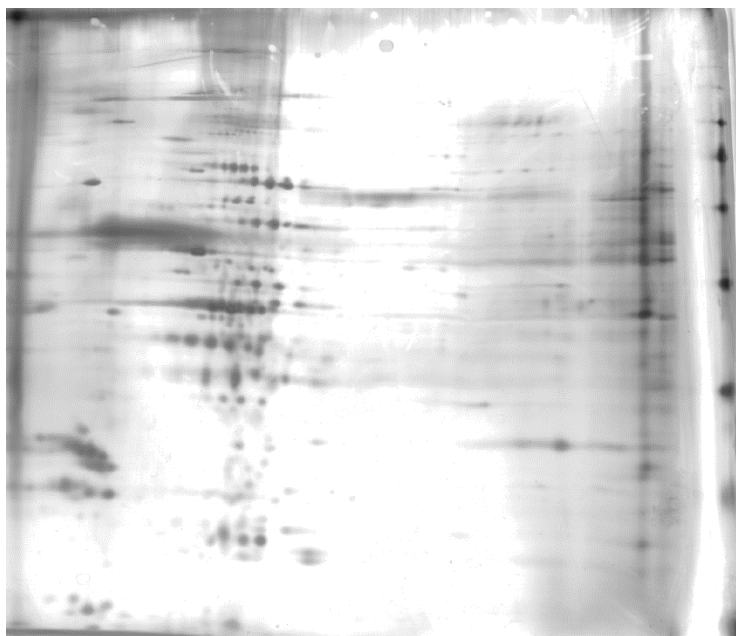

*Mecp2*<sup>-/-</sup> hippocampus 5

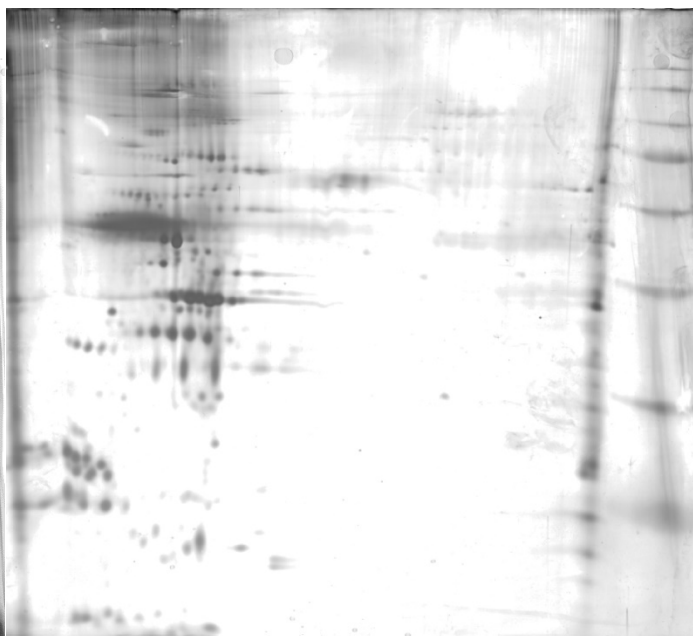

*Mecp2*<sup>-/-</sup> hippocampus 6

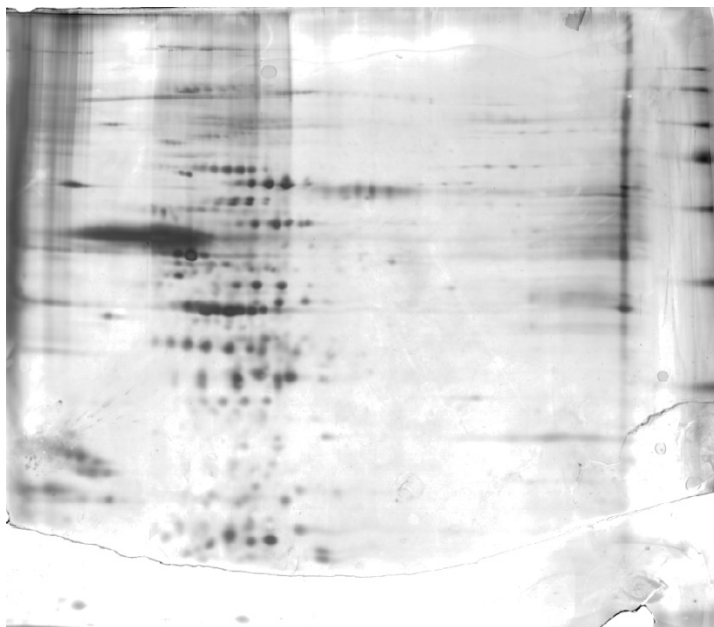

*Mecp2*<sup>-/-</sup> hippocampus 7

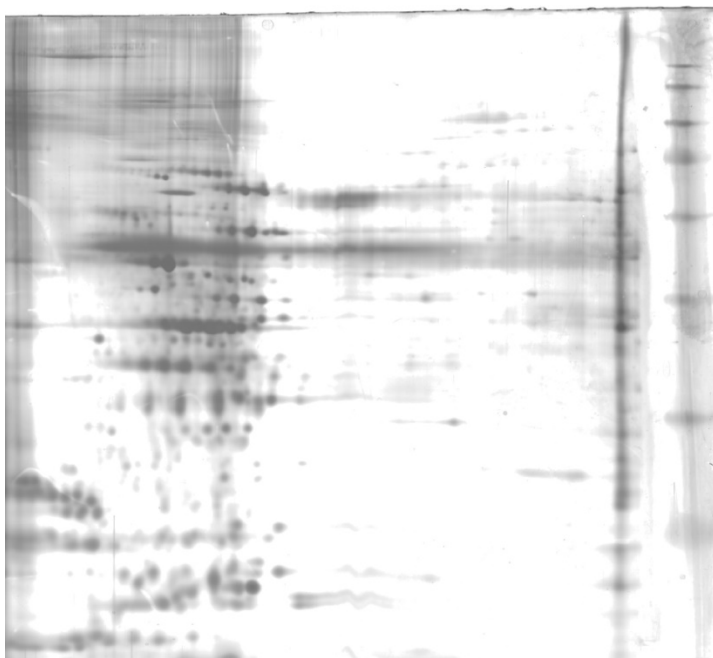

*Mecp2*<sup>-/-</sup> hippocampus 8

## Wildtype neocortex

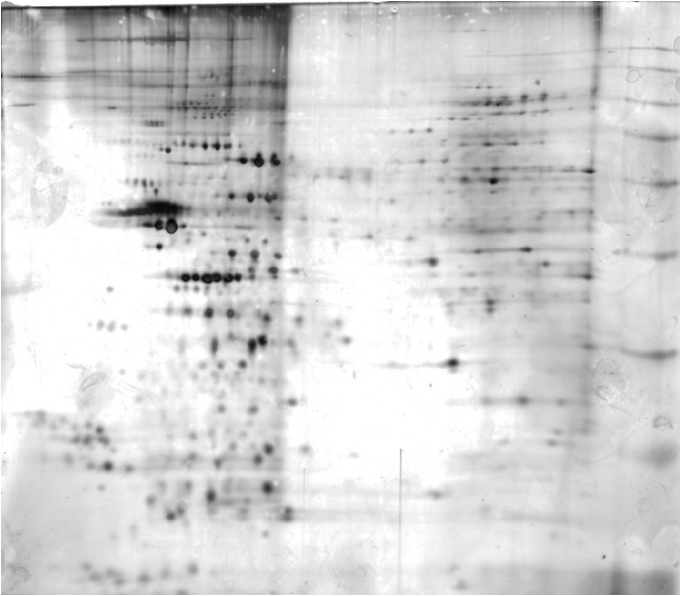

Wildtype neocortex 1

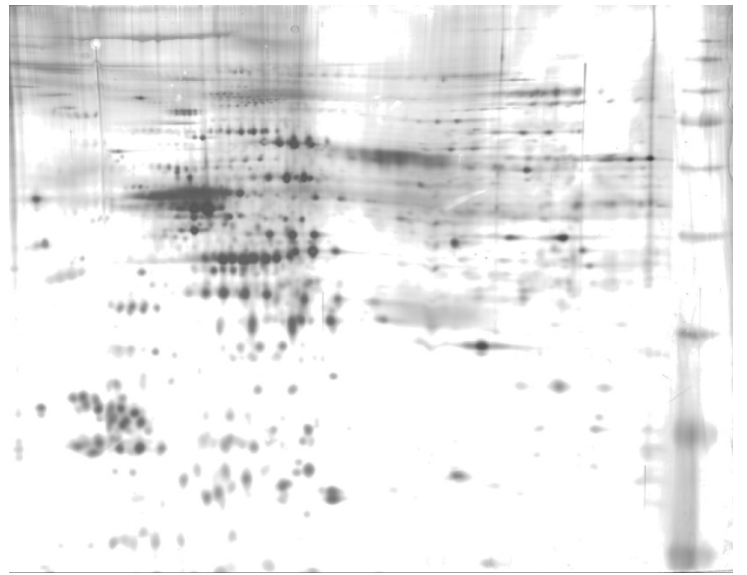

Wildtype neocortex 2

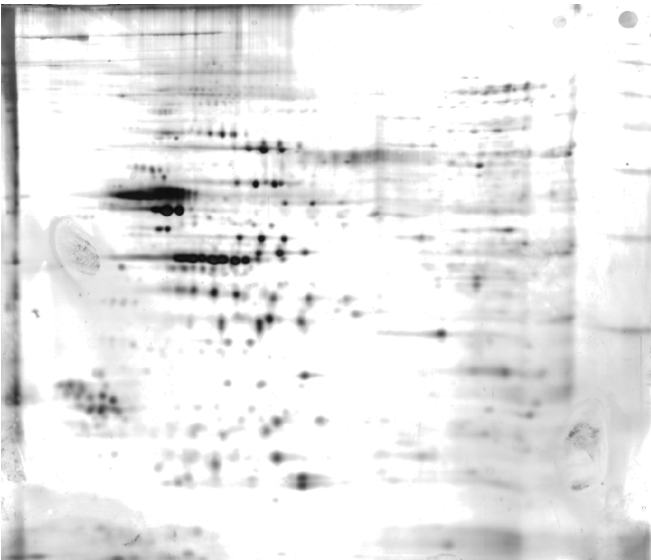

Wildtype neocortex 3

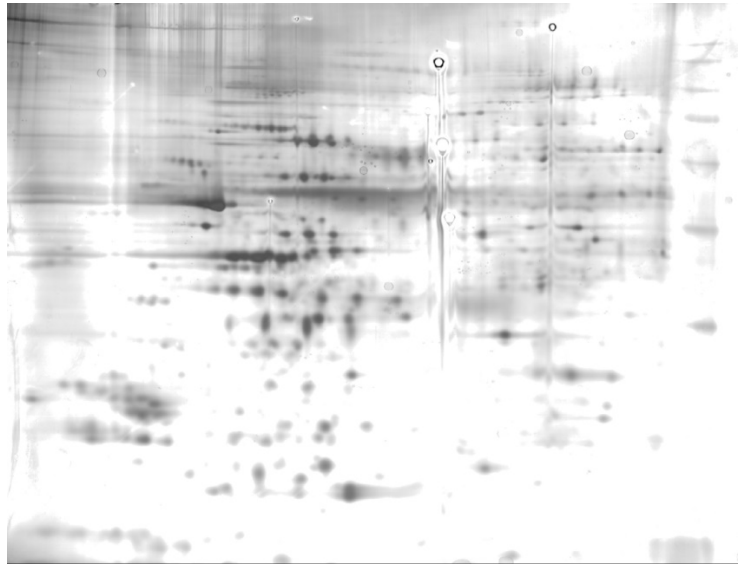

Wildtype neocortex 4

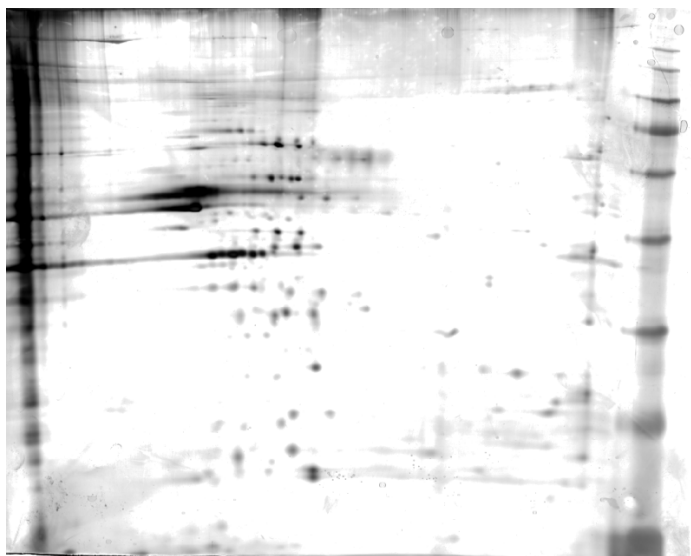

Wildtype neocortex 5

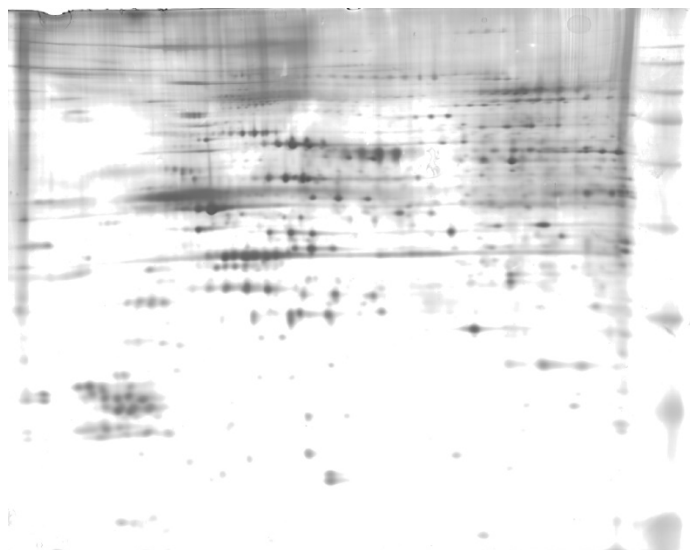

Wildtype neocortex 6

*Mecp2*<sup>-/y</sup> neocortex

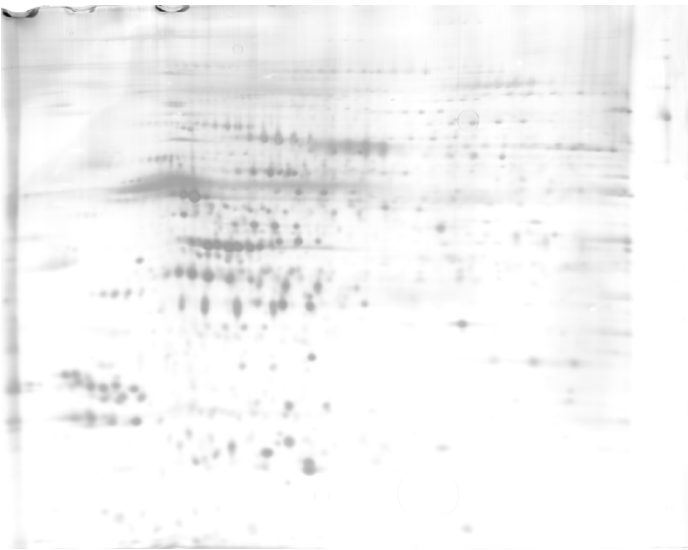

*Mecp2*<sup>-/-</sup> neocortex 1

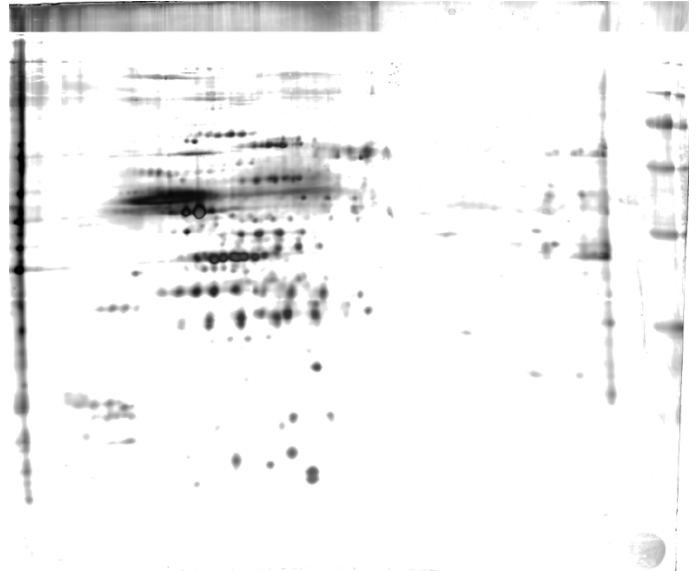

*Mecp2*<sup>-/-</sup> neocortex 2

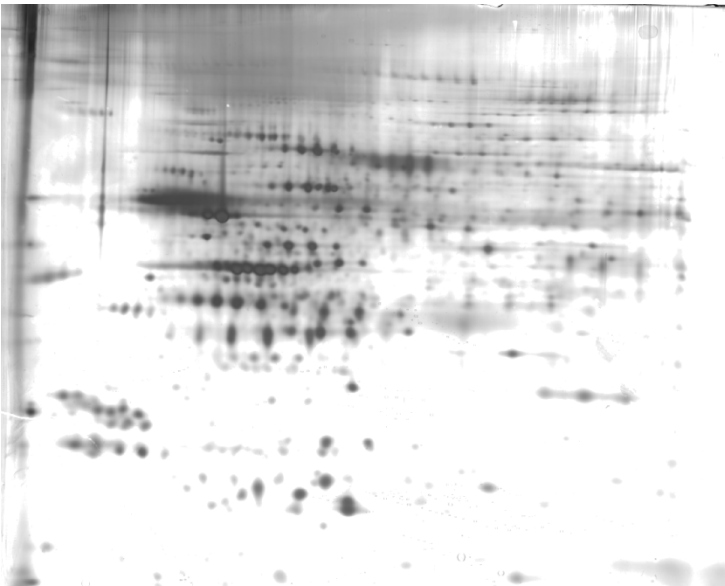

*Mecp2*<sup>-/-</sup> neocortex 3

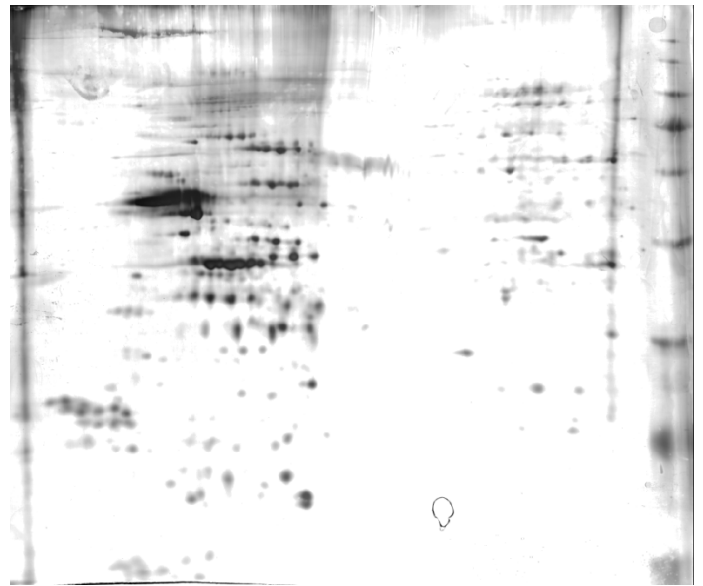

*Mecp2*<sup>-/-</sup> neocortex 4



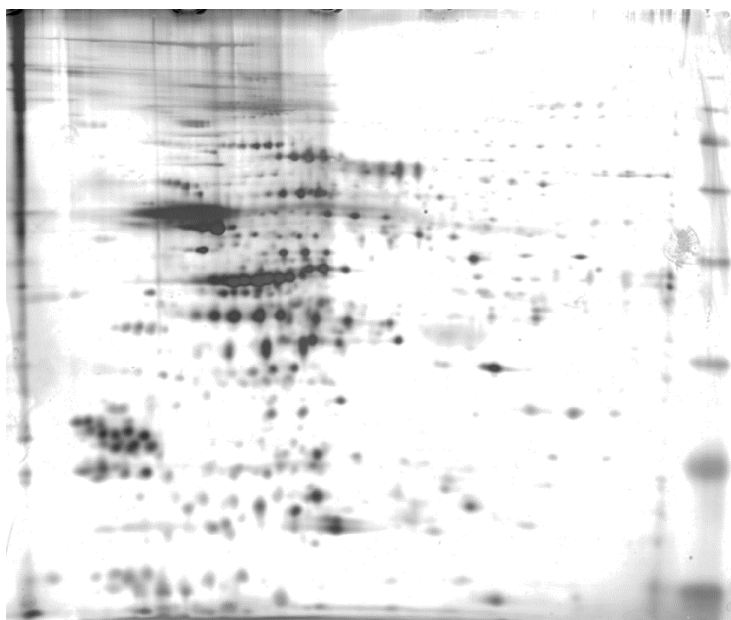

*Mecp2*<sup>-/-</sup> neocortex 5

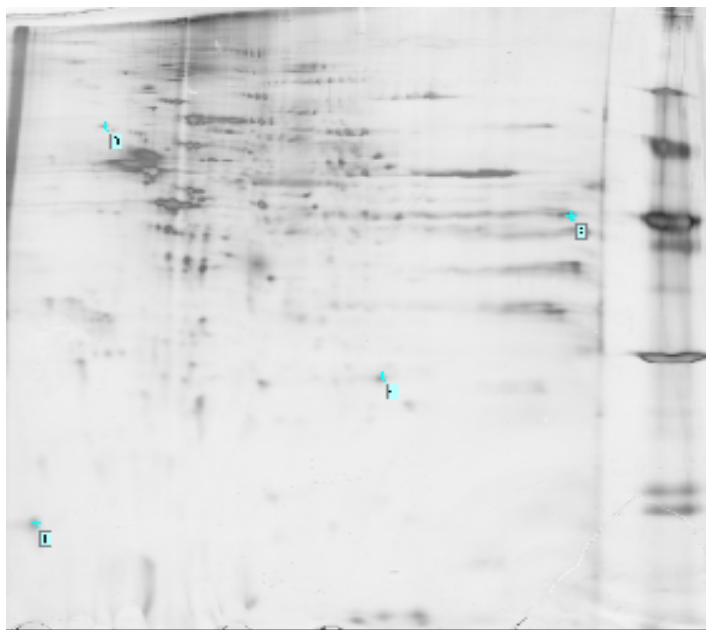

*Mecp2*<sup>-/-</sup> neocortex 6
