# Supplementary material for: Mitochondrial Proteome Changes in Rett Syndrome
Source: MDPI journal article supplement (doi:10.3390/biology12070956), 2023-07-03
Supplement: s1 [file s1]

**Table S1.** Representative data of proteins identified in spots by MS analysis.**HIPPOCAMPUS**

| AN     | Protein                                                         | Score | Coverage | Proteins | Unique peptides | Peptides | Peptide spectrum matches (PSM)* | Amino acids | Molecular weight (KDa) | Calculated Pi |
|--------|-----------------------------------------------------------------|-------|----------|----------|-----------------|----------|---------------------------------|-------------|------------------------|---------------|
| Q9D051 | Pyruvate dehydrogenase E1 component subunit beta, mitochondrial | 43.08 | 24.23%   | 1        | 6               | 6        | 18                              | 359         | 38.9                   | 6.87          |
| Q9D051 | Pyruvate dehydrogenase E1 component subunit beta, mitochondrial | 12.16 | 8.91%    | 1        | 2               | 2        | 7                               | 359         | 38.9                   | 6.87          |
| Q9D051 | Pyruvate dehydrogenase E1 component subunit beta, mitochondrial | 8.35  | 19.50%   | 1        | 5               | 5        | 7                               | 359         | 38.9                   | 6.87          |
| Q9D051 | Pyruvate dehydrogenase E1 component subunit beta, mitochondrial | 4.92  | 7.52%    | 1        | 2               | 2        | 4                               | 359         | 38.9                   | 6.87          |
| Q9D051 | Pyruvate dehydrogenase E1 component subunit beta, mitochondrial | 4.38  | 27.30%   | 1        | 7               | 7        | 10                              | 359         | 38.9                   | 6.87          |
| Q91VD9 | NADH-ubiquinone oxidoreductase 75 kDa subunit, mitochondrial    | 7.07  | 3.99%    | 1        | 2               | 2        | 3                               | 727         | 79.7                   | 5.72          |
| Q91VD9 | NADH-ubiquinone oxidoreductase 75 kDa subunit, mitochondrial    | 2.1   | 2.20%    | 1        | 1               | 1        | 1                               | 727         | 79.7                   | 5.72          |
| Q8K3J1 | NADH dehydrogenase [ubiquinone] iron-sulfur protein 8           | 21.86 | 8.49%    | 1        | 1               | 1        | 7                               | 212         | 24                     | 6.21          |
| Q9D6J6 | NADH dehydrogenase [ubiquinone] flavoprotein 2, mitochondrial   | 4.38  | 27.02%   | 1        | 3               | 3        | 6                               | 248         | 27.3                   | 7.4           |
| Q9D6J6 | NADH dehydrogenase [ubiquinone] flavoprotein 2, mitochondrial   | 20.79 | 51.61%   | 1        | 8               | 8        | 13                              | 248         | 27.3                   | 7.4           |

|        |                                                       |       |        |   |    |    |    |     |      |      |
|--------|-------------------------------------------------------|-------|--------|---|----|----|----|-----|------|------|
| Q9CZ13 | Cytochrome b-c1 complex subunit 1, mitochondrial      | 67    | 31.87% | 1 | 10 | 10 | 23 | 480 | 52.8 | 6.21 |
| Q9DCX2 | ATP synthase subunit d, mitochondrial                 | 5.69  | 38.51% | 1 | 4  | 4  | 5  | 161 | 18.7 | 5.69 |
| Q9DCX2 | ATP synthase subunit d, mitochondrial                 | 5.77  | 10.56% | 1 | 1  | 1  | 3  | 161 | 18.7 | 5.69 |
| Q04447 | Creatine kinase B-type                                | 32.03 | 19.95% | 1 | 5  | 5  | 16 | 381 | 42.7 | 5.67 |
| Q04447 | Creatine kinase B-type                                | 39.52 | 24.67% | 1 | 7  | 7  | 15 | 381 | 42.7 | 5.67 |
| Q04447 | Creatine kinase B-type                                | 55.27 | 17.32% | 1 | 5  | 5  | 20 | 381 | 42.7 | 5.67 |
| Q04447 | Creatine kinase B-type                                | 1.73  | 13.91% |   | 3  | 3  | 3  | 381 | 42.7 | 5.67 |
| P67778 | Prohibitin-1                                          | 8.83  | 15.81% | 1 | 3  | 3  | 6  | 272 | 29.8 | 5.76 |
| P17183 | Gamma-enolase                                         | 2.2   | 7.14%  | 1 | 1  | 1  | 1  | 434 | 47.3 | 5.11 |
| P17183 | Gamma-enolase                                         | 23.96 | 26.73% | 3 | 8  | 8  | 21 | 434 | 47.3 | 5.11 |
| P05132 | cAMP-dependent protein kinase catalytic subunit alpha | 17.63 | 3.70%  | 1 | 1  | 1  | 8  | 351 | 40.5 | 8.79 |

## NEOCORTEX

| AN     | Protein                                               | Score | Coverage | Proteins | Unique peptides | Peptides | Peptide spectrum matches (PSM)* | Amino acids | Molecular weight (KDa) | Calculated Pi |
|--------|-------------------------------------------------------|-------|----------|----------|-----------------|----------|---------------------------------|-------------|------------------------|---------------|
| Q9CZ13 | Cytochrome b-c1 complex subunit 1, mitochondrial      | 12.98 | 21.25%   | 1        | 8               | 8        | 14                              | 480         | 52.8                   | 6.21          |
| P18872 | Guanine nucleotide-binding protein G(o) subunit alpha | 7.86  | 7.63%    | 4        | 2               | 2        | 5                               | 354         | 40.1                   | 5.53          |
| P18872 | Guanine nucleotide-binding protein G(o) subunit alpha | 28.46 | 14.97%   | 4        | 4               | 4        | 11                              | 354         | 40.1                   | 5.53          |
| P18872 | Guanine nucleotide-binding protein G(o) subunit alpha | 14.81 | 26.55%   | 11       | 8               | 8        | 17                              | 354         | 40.1                   | 4.82          |
| P18872 | Guanine nucleotide-binding protein G(o) subunit alpha | 6.7   | 21.47%   | 11       | 6               | 6        | 10                              | 354         | 40.1                   | 5.53          |

|        |                                                       |       |        |   |    |    |    |     |      |      |
|--------|-------------------------------------------------------|-------|--------|---|----|----|----|-----|------|------|
| P67778 | Prohibitin-1                                          | 13.8  | 38.97% | 1 | 9  | 9  | 19 | 272 | 29.8 | 5.76 |
| P17183 | Gamma-enolase                                         | 56.01 | 38.94% | 3 | 10 | 10 | 22 | 434 | 47.3 | 5.11 |
| P05132 | cAMP-dependent protein kinase catalytic subunit alpha | 5.79  | 3.70%  | 1 | 1  | 1  | 5  | 351 | 40.5 | 8.79 |
| P68254 | 14-3-3 protein theta                                  | 7.38  | 15.10% | 1 | 3  | 3  | 3  | 245 | 27.8 | 4.78 |

\* PSM value may be higher than the number of peptides identified for high-scoring proteins, as peptides may be identified repeatedly.
